# Supplementary material
Source: Springer Nature journal article supplement (https://www.springermedizin.de/resource/supplementary/13000_2011_510_MOESM2_ESM.pdf/9624702)

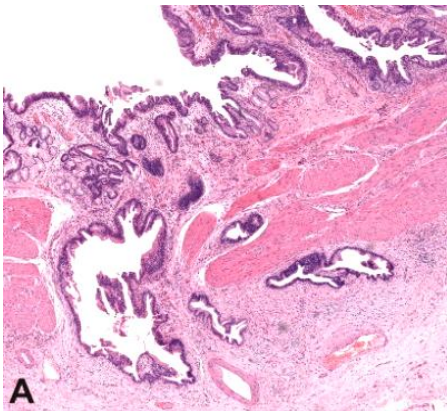

**A**

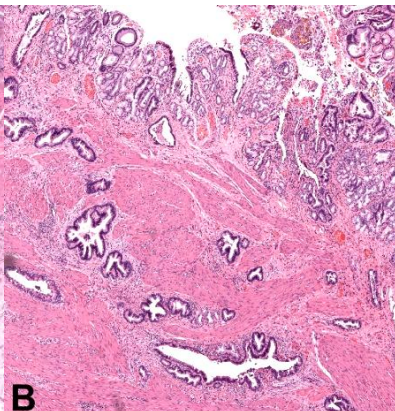

**B**

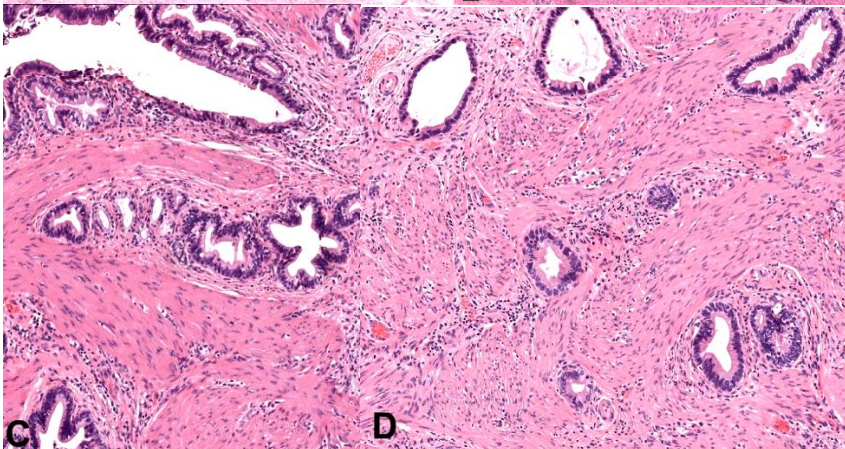

**C**

**D**

Supplement: MOESM2 [file 9624702]
